# Supplementary material for: A post-synthetically modified porous organic polymer for photocatalytic water purification
Source: Royal Society of Chemistry journal article supplement (doi:10.1039/d3qm00142c), 2023-01-01
Supplement: d3qm00142c1.pdf [file d3qm00142c1.pdf]

## Supporting Information

# Post-Synthetically Modified Porous Organic Polymer for Photocatalytic Water Purification

Minhyeok Choi,<sup>†</sup> Nem Singh,<sup>†</sup> Subin Son, Ji Hyeon Kim, Minjung Kang, Su Hong Park, Dong Hoon

Choi,<sup>\*</sup> Chang Seop Hong<sup>\*</sup> and Jong Seung Kim<sup>\*</sup>

Department of Chemistry, Korea University, Seoul 02841, Korea

<sup>\*</sup>E-mail: dhchoi8803@korea.ac.kr, cshong@korea.ac.kr and [jongskim@korea.ac.kr](mailto:jongskim@korea.ac.kr)

<sup>†</sup> These authors contributed equally to this work.

## Table of Contents

| S.N. | Contents                                                                                                                                                                               | Page  |
|------|----------------------------------------------------------------------------------------------------------------------------------------------------------------------------------------|-------|
| 1.   | <sup>1</sup> H NMR, enlarged synthesis scheme of <b>PNP</b> , IR data of CHO-TPP, NPDH, and <b>PNP</b> and solid-state <sup>13</sup> C NMR spectra of <b>PNP</b>                       | S3-S4 |
| 2.   | TGA analysis of <b>PNP</b> and <b>Pt@PNP</b> and EDS elemental mapping of <b>Pt@PNP</b> without black dot                                                                              | S5    |
| 3.   | Area EDS spectra of <b>Pt@PNP</b> without black dot and SEM images of <b>PNP</b> and <b>Pt@PNP</b> for checking the stability                                                          | S6    |
| 4.   | XPS analysis of <b>PNP</b> , Solid-state UV-vis spectra of <b>PNP</b> and <b>Pt@PNP</b> , and the optical band gap of <b>PNP</b> from ssUV-vis reflectance spectra                     | S7    |
| 5.   | Cyclic voltammetry data of ferrocene as a reference, <b>PNP</b> , and <b>Pt@PNP</b> to measure the energy level of polymers.                                                           | S8    |
| 6.   | The reaction scheme of ABDA with singlet oxygen and ROS generation experiment using ABDA indicator                                                                                     | S9    |
| 7.   | The reaction scheme of DHR123 and superoxide radical generation experiment                                                                                                             | S10   |
| 8.   | The reaction scheme of RNO and hydroxyl radical generation experiment, and the reaction scheme of TEMP and DMPO, as spin trapping-agent, after reacting with each ROS                  | S11   |
| 9.   | The methyl orange degradation experiment; Time-dependent UV-Vis absorption spectra of MO in aqueous solution upon white LED lamp irradiation without/with <b>PNP</b> and <b>Pt@PNP</b> | S12   |
| 10.  | The rhodamine B degradation experiment; time-dependent UV-Vis absorption spectra of Rh B in aqueous solution upon white LED lamp irradiation without/with <b>PNP</b> and <b>Pt@PNP</b> | S13   |

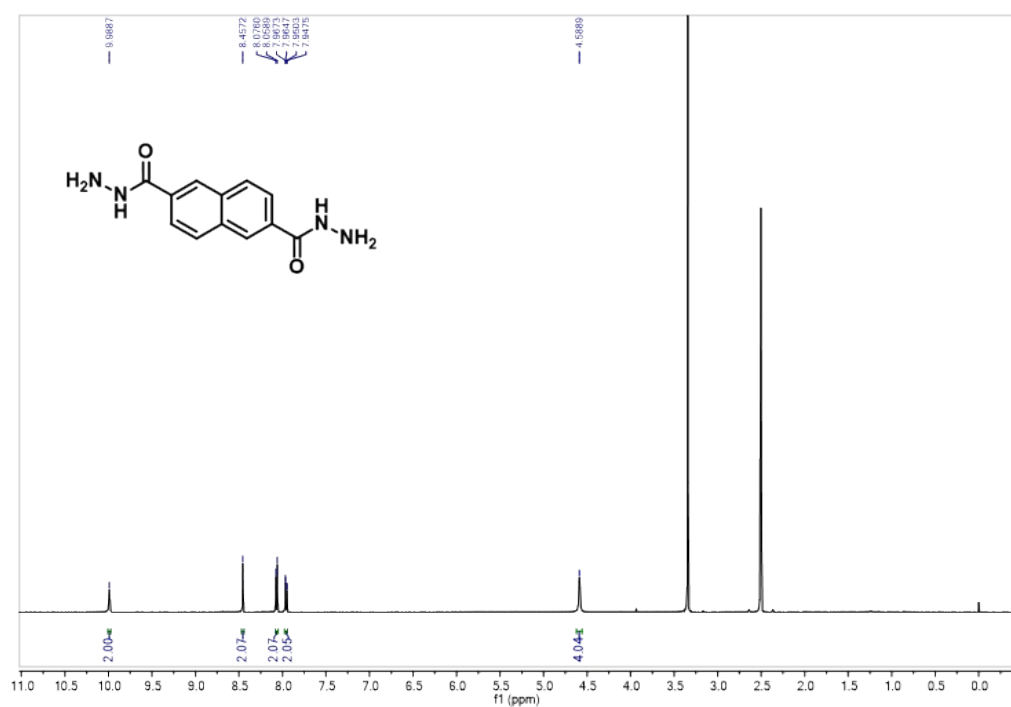

**Fig. S1** <sup>1</sup>H NMR (DMSO, 500 MHz) spectrum of NPDH

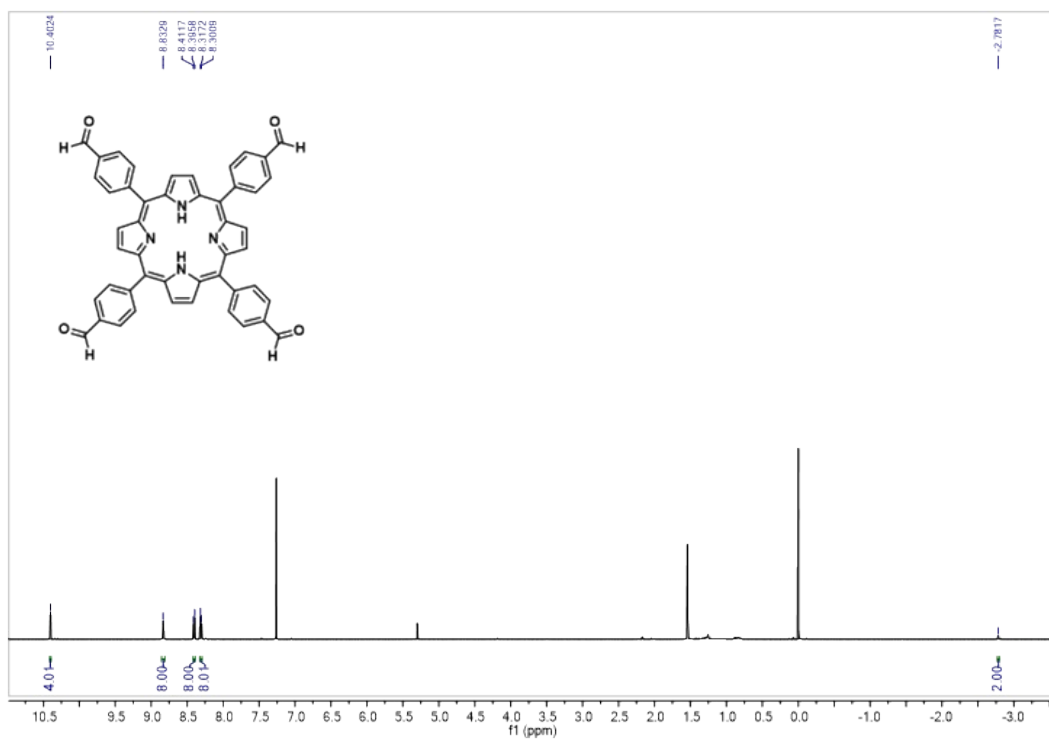

**Fig. S2** <sup>1</sup>H NMR (CDCl<sub>3</sub>, 500 MHz) spectrum of CHO-TPP

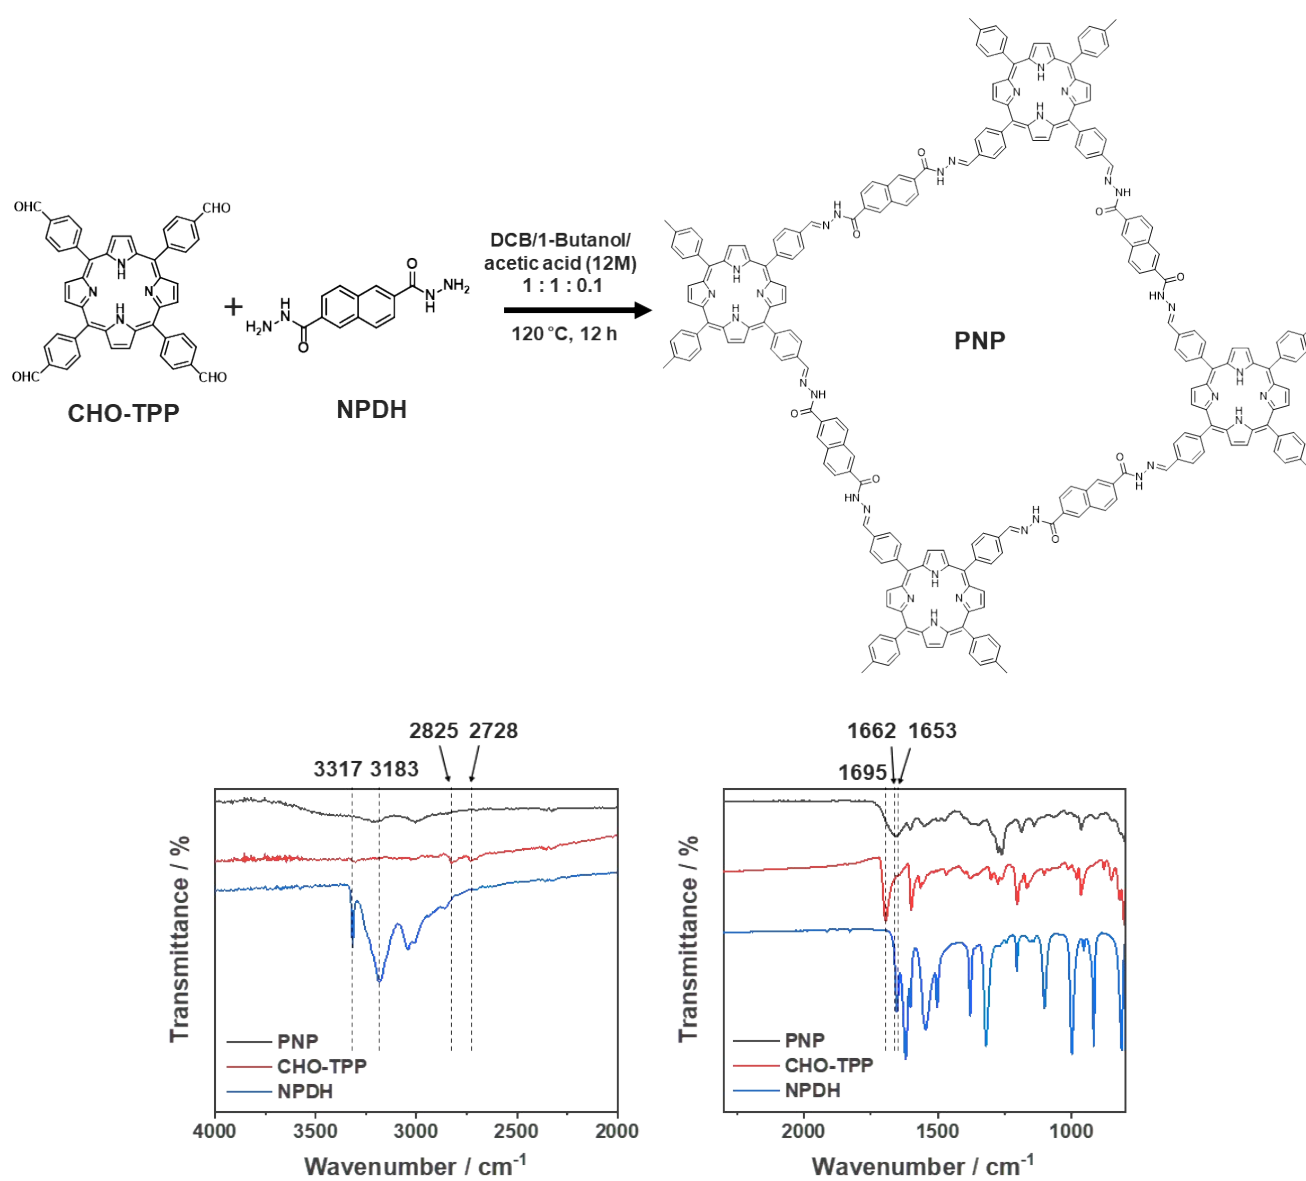

**Fig. S3** Systematic representation of synthesis of PNP (top) and IR spectra of CHO-TPP, NPDH, and PNP.

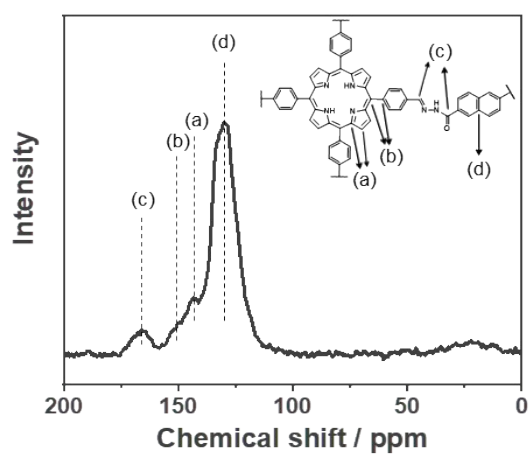

**Fig. S4** Solid-state  $^{13}\text{C}$  NMR spectra of PNP.

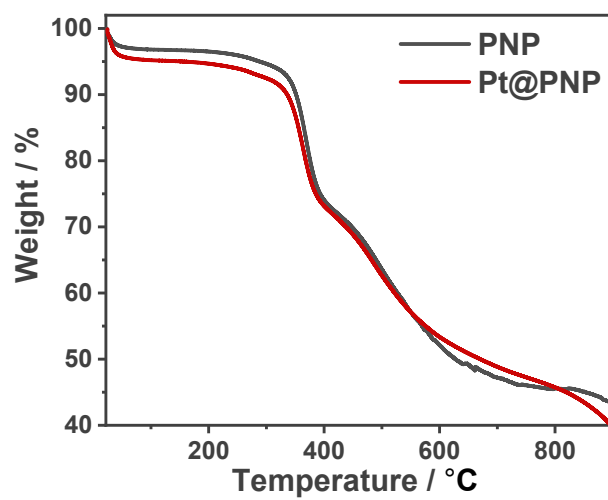

**Fig. S5** TGA analysis of PNP and Pt@PNP.

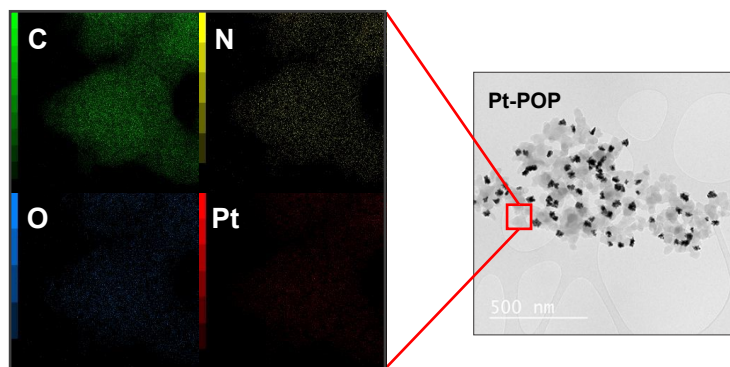

**Fig. S6** EDS elemental mapping of Pt@PNP without black dot.

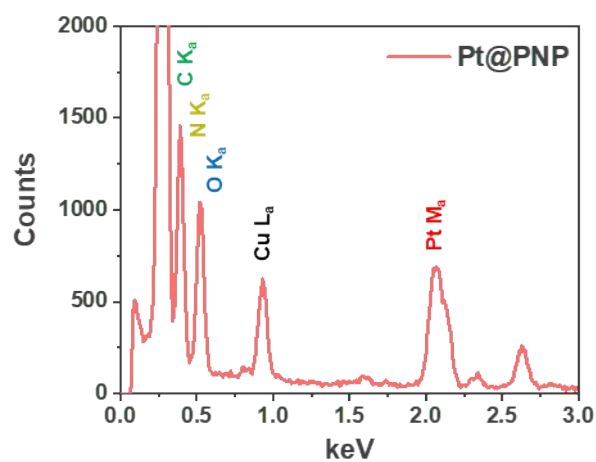

**Fig. S7**Area EDS spectra of **Pt@PNP** without black dot.

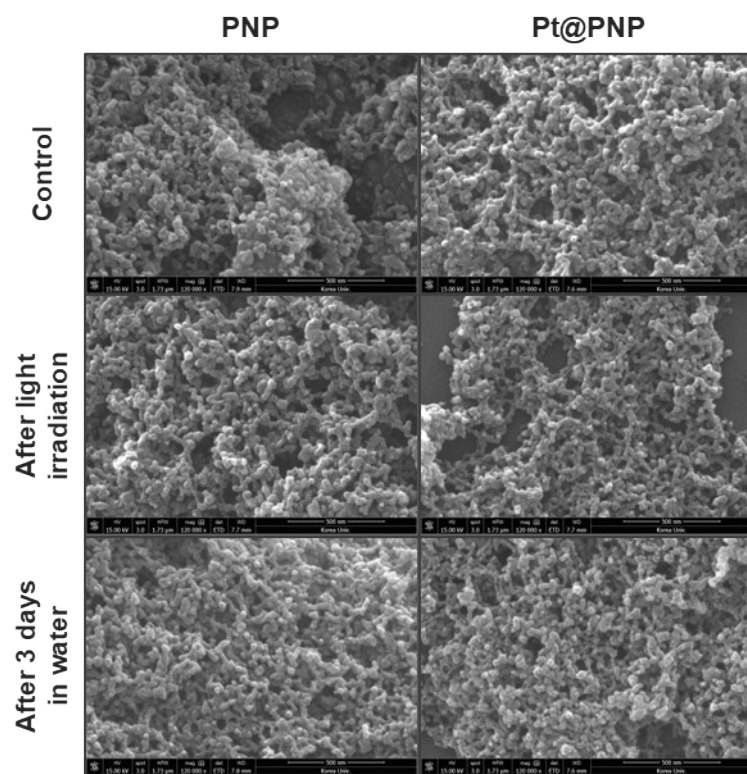

**Fig. S8** SEM images of **PNP** and **Pt@PNP** for checking stability under light irradiation for 2 h and in water for 3 days.

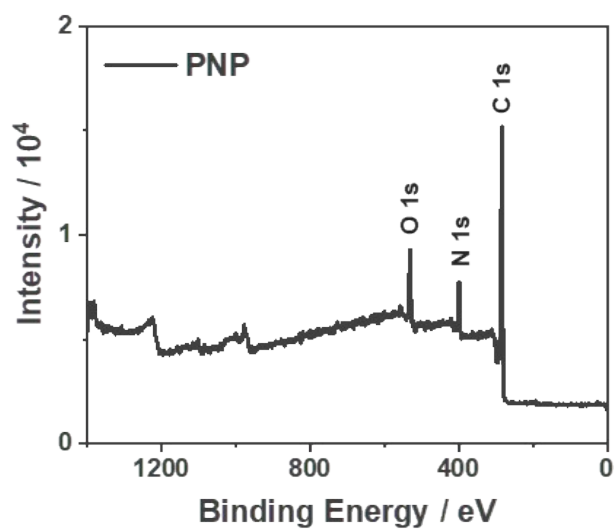

**Fig. S9** XPS analysis of **PNP**.

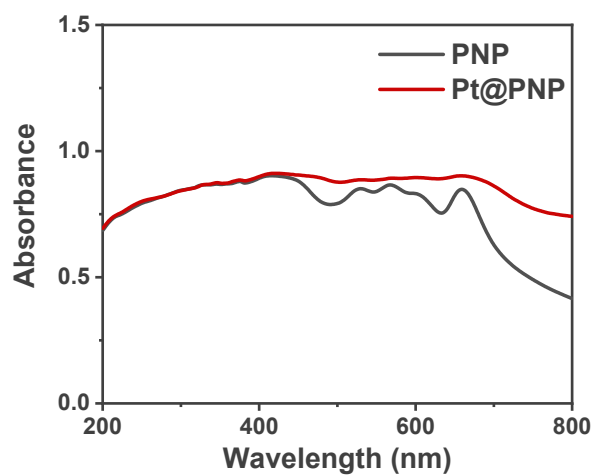

**Fig. S10** Solid-state UV-vis spectra of **PNP** and **Pt@PNP**.

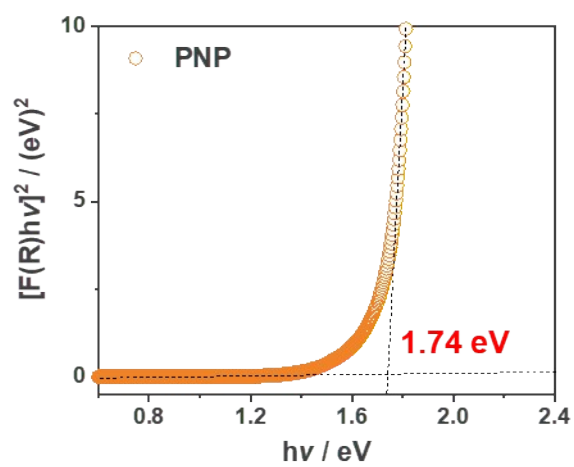

**Fig. S11** The optical band gap of **PNP** from ssUV-vis reflectance spectra.

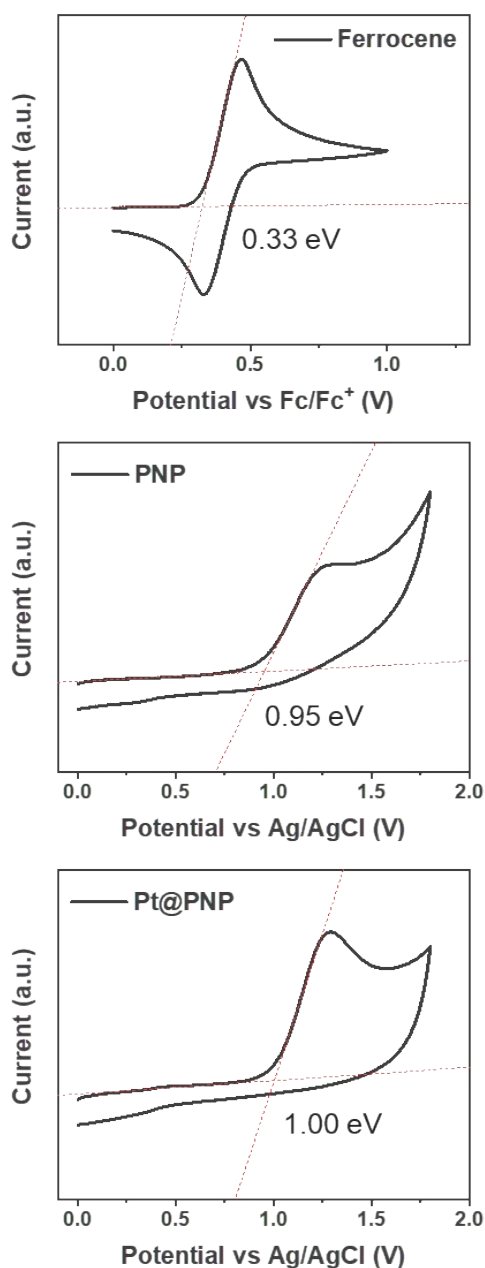

**Fig. S12** Cyclic voltammetry data of ferrocene as a reference, **PNP**, and **Pt@PNP** to measure the energy level of polymers. Before the measurement of the energy level of polymers, the experiment was conducted using ferrocene as a reference in anhydrous acetonitrile with tetrabutylammonium hexafluorophosphate (0.1 M). The working electrode was prepared by drop-casting water/isopropyl alcohol suspension of POP with 5 wt% Nafion.

## Solution test data of POPs

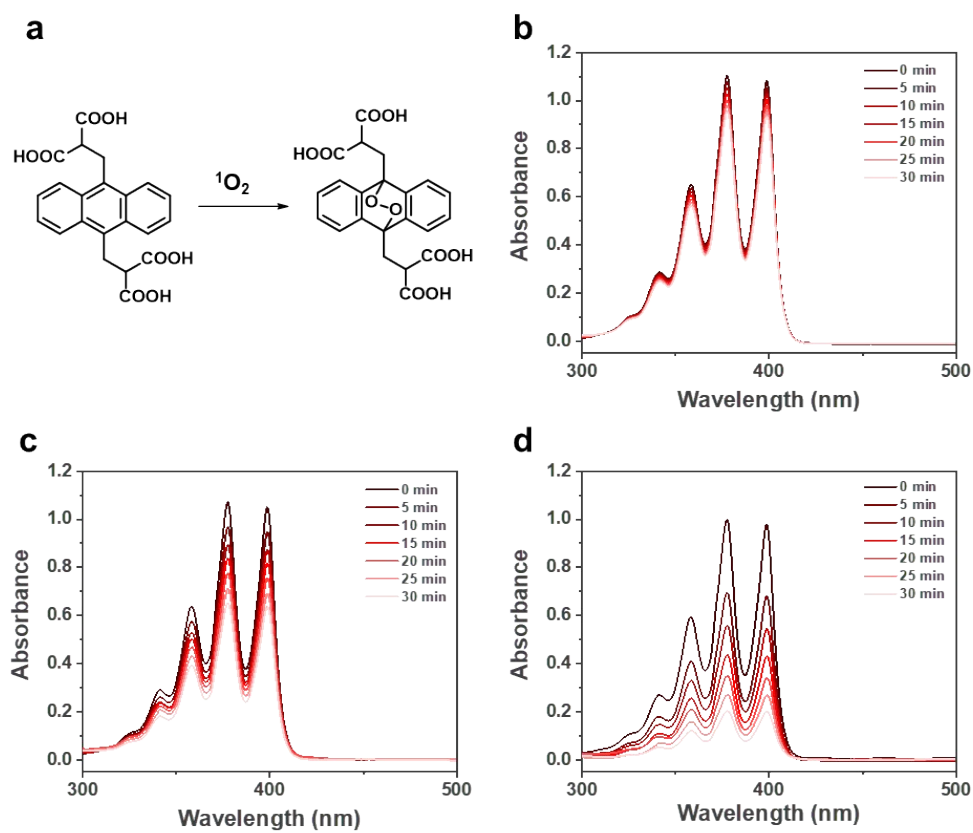

**Fig. S13** (a) The reaction scheme of ABDA with singlet oxygen. Time-dependent UV-Vis absorption spectra of ABDA (100  $\mu$ M) in 1% DMSO/water solution upon white LED lamp irradiation (50 mW/cm<sup>2</sup>) (b) without/with (c) PNP and (d) Pt@PNP (0.1 mg/mL).

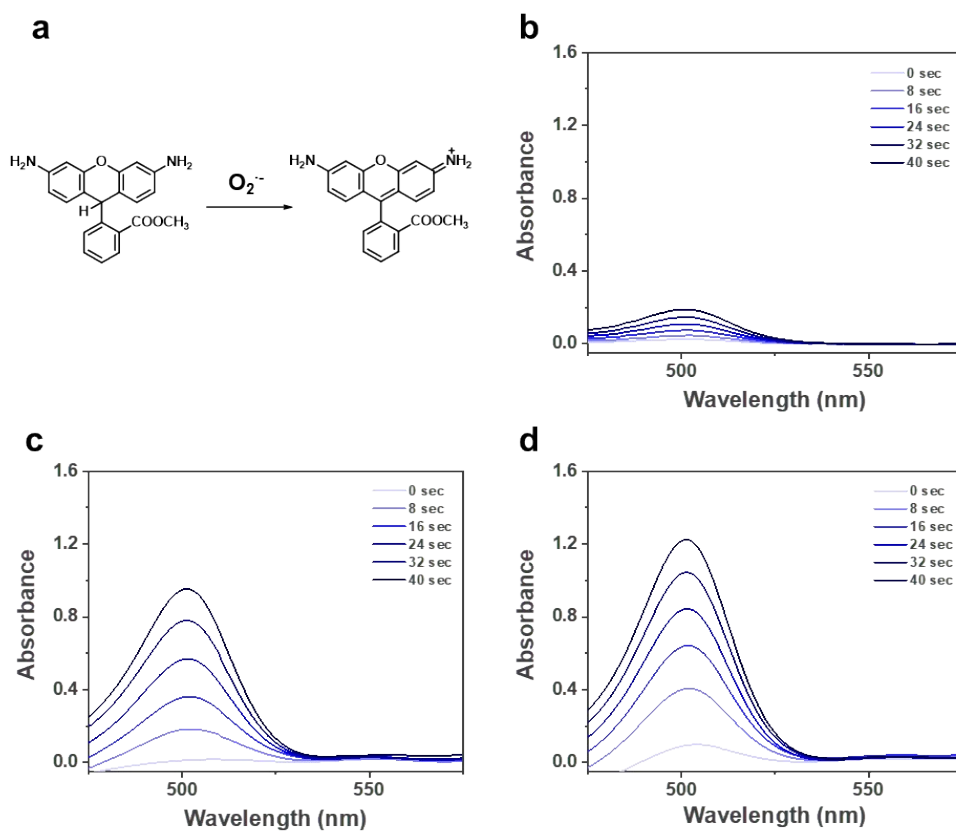

**Fig. S14** (a) The reaction scheme of DHR123 with superoxide radical. Time-dependent UV-Vis absorption spectra of DHR123 (100  $\mu\text{M}$ ) in 1% DMSO/water solution upon white LED lamp irradiation (50  $\text{mW}/\text{cm}^2$ ) (b) without/with (c) **PNP** and (d) **Pt@PNP** (0.1  $\text{mg}/\text{mL}$ ).

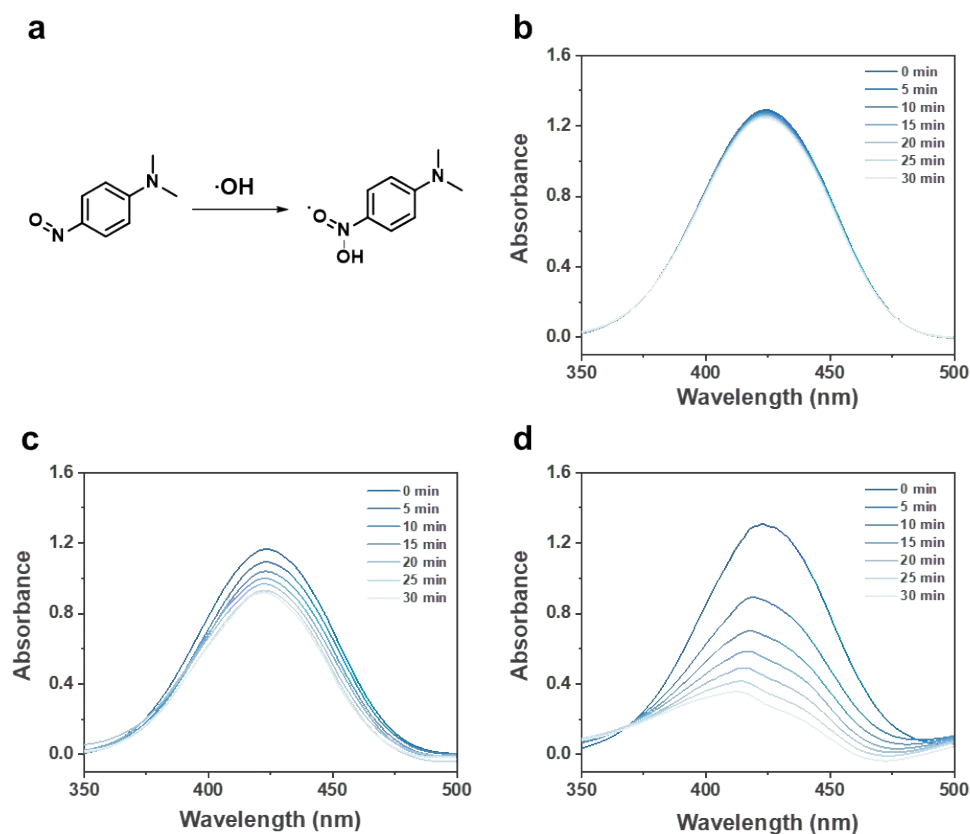

**Fig. S15** (a) The reaction scheme of RNO with hydroxyl radical. Time-dependent UV-Vis absorption spectra of RNO (50  $\mu\text{M}$ ) in MeOH solution upon white LED lamp irradiation (50  $\text{mW}/\text{cm}^2$ ) (b) without/with (c) PNP and (d) Pt@PNP (0.1  $\text{mg}/\text{mL}$ ).

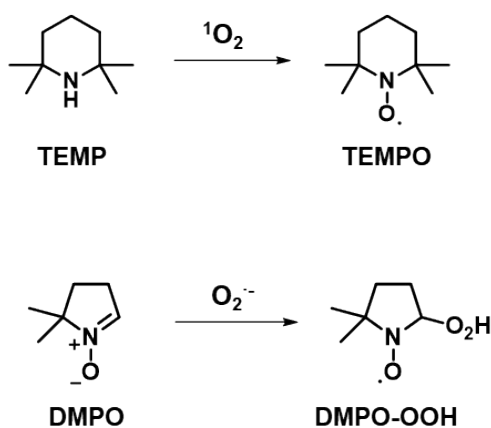

**Fig. S16** The reaction scheme of TEMP and DMPO, as spin trapping-agent, after reacting with each ROS.

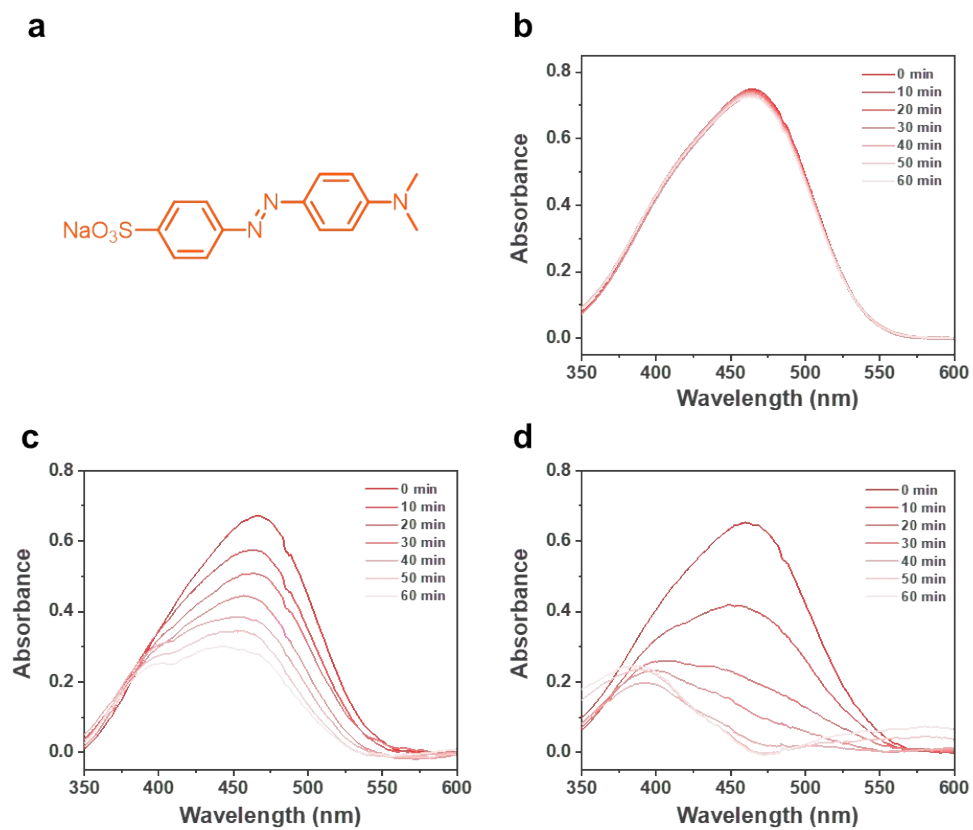

**Fig. S17** (a) The structure scheme of methyl orange. Time-dependent UV-Vis absorption spectra of MO (10 ppm) in aqueous solution upon white LED lamp irradiation (50 mW/cm<sup>2</sup>) (b) without/with (c) **PNP** and (d) **Pt@PNP** (0.1 mg/mL).

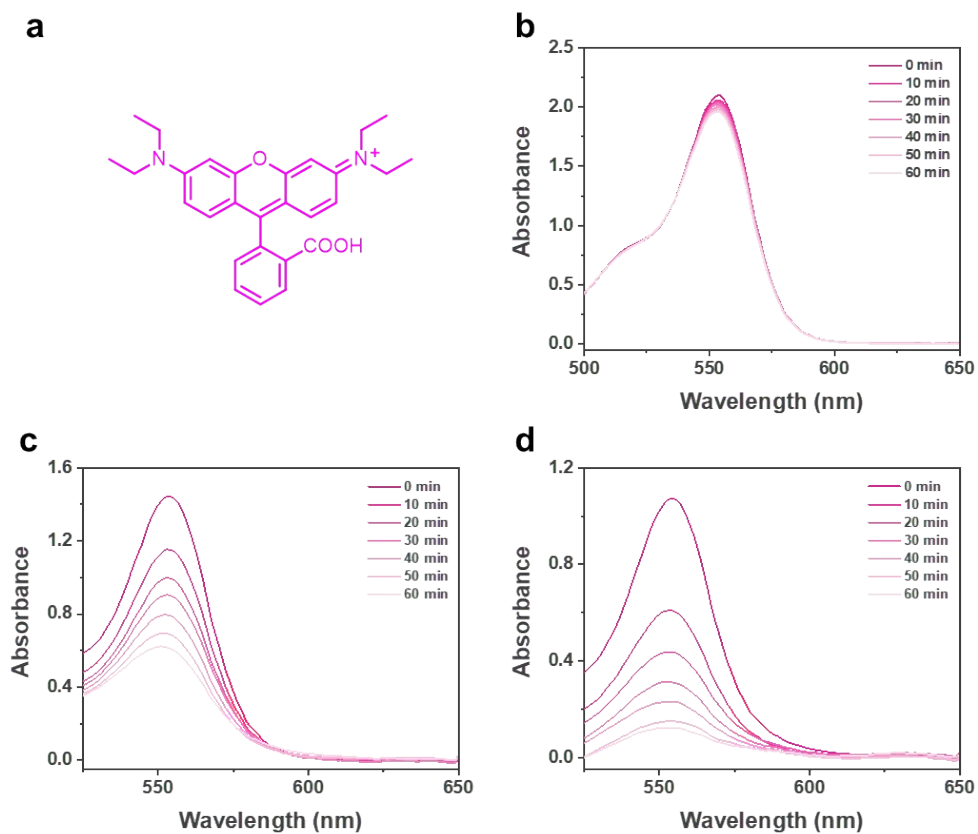

**Fig. S18** (a) The structure scheme of rhodamine B. Time-dependent UV-Vis absorption spectra of Rh B (10 ppm) in aqueous solution upon white LED lamp irradiation (50 mW/cm<sup>2</sup>) (b) without/with (c) **PNP** and (d) **Pt@PNP** (0.1 mg/mL).
